# Supplementary material for: Phytoestrogen Coumestrol Selectively Inhibits Monoamine Oxidase-A and Amyloid β Self-Aggregation
Source: MDPI journal article supplement (doi:10.3390/nu14183822), 2022-09-16
Supplement: s1 [file s1]

**Table S1.** Kinetic parameters for Lineweaver-Burk plot and its secondary plots.

| [Substrate,<br>$\mu\text{M}$ ] | [Coumestrol,<br>$\mu\text{M}$ ] | RLU    |        |        |          |           | 1/V [= 1/(RLU/60min)] |          |
|--------------------------------|---------------------------------|--------|--------|--------|----------|-----------|-----------------------|----------|
|                                |                                 | 1      | 2      | 3      | Mean     | SD        | Mean                  | SD       |
| 160                            | 0                               | 465715 | 468709 | 486780 | 473734.7 | 11396.339 | 0.000127              | 0.000003 |
|                                | 2.5                             | 219596 | 233409 | 236873 | 229959.3 | 9140.505  | 0.000261              | 0.000011 |
|                                | 10                              | 118306 | 128367 | 117253 | 121308.7 | 6135.3284 | 0.000495              | 0.000024 |
|                                | 20                              | 69778  | 76748  | 80190  | 75572    | 5304.6836 | 0.000797              | 0.000057 |
| 80                             | 0                               | 404077 | 393284 | 404201 | 400520.7 | 6267.4438 | 0.000150              | 0.000002 |
|                                | 2.5                             | 126502 | 126966 | 125654 | 126374   | 665.29993 | 0.000475              | 0.000003 |
|                                | 10                              | 66093  | 64057  | 61882  | 64010.67 | 2105.8823 | 0.000938              | 0.000031 |
|                                | 20                              | 36461  | 36478  | 40008  | 37649    | 2042.9716 | 0.001597              | 0.000084 |
| 40                             | 0                               | 332626 | 318019 | 317481 | 322708.7 | 8592.8742 | 0.000186              | 0.000005 |
|                                | 2.5                             | 83446  | 79324  | 82581  | 81783.67 | 2173.5976 | 0.000734              | 0.000020 |
|                                | 10                              | 33297  | 39254  | 37597  | 36716    | 3074.6679 | 0.001642              | 0.000142 |
|                                | 20                              | 20692  | 20299  | 20131  | 20374    | 287.92186 | 0.002945              | 0.000041 |

**Table S2.** Fluorescent signals obtained from self A $\beta_{25-35}$  aggregation assay.

| Purpose                   | Compounds  | Concentrations<br>( $\mu$ M) | Fluorescence (Emission = 490 nm / Excitation = 446 nm, $n = 3$ ) |          |          |                    |
|---------------------------|------------|------------------------------|------------------------------------------------------------------|----------|----------|--------------------|
|                           |            |                              | 1                                                                | 2        | 3        | Control for sample |
| Screening active compound | Blank      | -                            | 274.456                                                          | 273.691  | 267.102  | 269.222            |
|                           | Control    | -                            | 826.227                                                          | 807.578  | 779.828  | 325.1847           |
|                           | Rutin      | 100                          | 556.703                                                          | 574.097  | 523.388  | 308.423            |
|                           | Daidzein   | 100                          | 752.714                                                          | 744.841  | 739.542  | 436.703            |
|                           | Genistein  | 100                          | 656.961                                                          | 678.75   | 636.556  | 345.35             |
|                           | Coumestrol | 100                          | 420.995                                                          | 408.908  | 418.89   | 323.923            |
|                           | Curcumin   | 20                           | 446.557                                                          | 456.907  | 436.435  | 319.674            |
| Dose-dependent curves     | Coumestrol | 5                            | 874.9012                                                         | 872.4322 | 899.9266 | 307.558            |
|                           |            | 10                           | 820.955                                                          | 835.446  | 846.767  | 321.491            |
|                           |            | 20                           | 725.8814                                                         | 709.3678 | 704.8239 | 320.227            |
|                           |            | 50                           | 578.864                                                          | 549.001  | 576.214  | 310.912            |

|  |          |     |          |          |          |         |
|--|----------|-----|----------|----------|----------|---------|
|  |          | 100 | 484.285  | 460.697  | 486.519  | 315.877 |
|  | Curcumin | 5   | 714.733  | 699.957  | 732.987  | 309.277 |
|  |          | 10  | 659.3354 | 647.8281 | 645.7345 | 305.887 |
|  |          | 20  | 508.323  | 494.704  | 529.05   | 287.149 |
|  | Control  | -   | 980.052  | 989.522  | 1015.874 | 319.08  |
